# Supplementary material for: NiCo bimetallic nanoparticles encapsulated in graphite-like carbon layers as efficient and robust hydrogenation catalysts
Source: Royal Society of Chemistry journal article supplement (doi:10.1039/c7qi00492c), 2017-01-01
Supplement: c7qi00492c1.pdf [file c7qi00492c1.pdf]

## Supporting Information for:

NiCo bimetallic nanoparticles encapsulated in graphite-like carbon layers as efficient and robust hydrogenation catalysts

*Ting Ni,<sup>a</sup> Sai Zhang,<sup>\*a</sup> Fangxian Cao<sup>a</sup> and Yuanyuan Ma<sup>\*a</sup>*

*<sup>†</sup> Center for Applied Chemical Research, Frontier Institute of Science and Technology and School of Chemical Engineering and Technology, Xi'an Jiaotong University, Xi'an, 710049, China.*

**Email:** [yyma@mail.xjtu.edu.cn](mailto:yyma@mail.xjtu.edu.cn); [zhangsai1112@163.com](mailto:zhangsai1112@163.com)

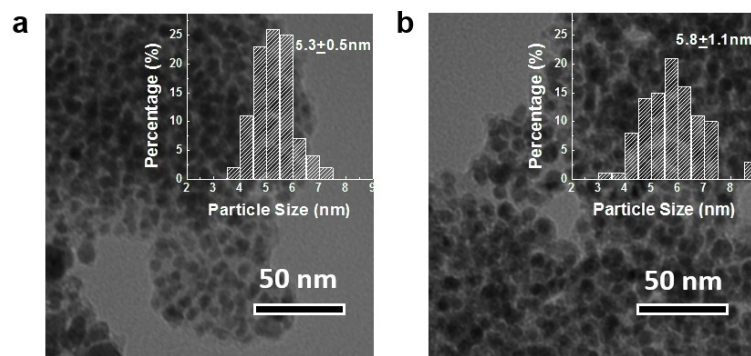

**Figure S1.** TEM images of (a)  $\text{Ni}_{0.25}\text{Co}_{0.75}@NC$  and (b)  $\text{Ni}_{0.75}\text{Co}_{0.25}@NC$  catalysts.

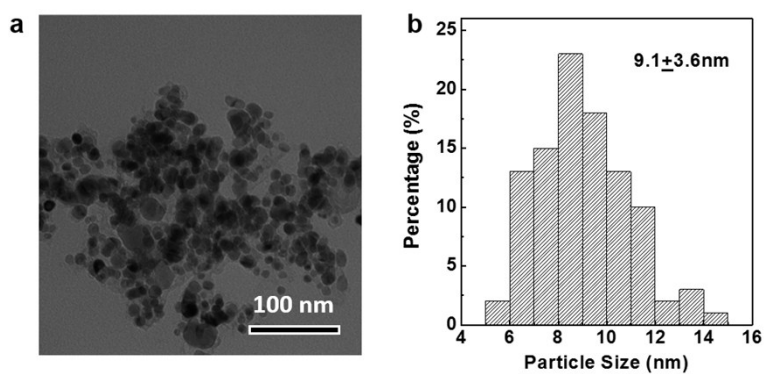

**Figure S2.** (a) TEM image and (b) size distribution of the Co@NC nanoparticles.

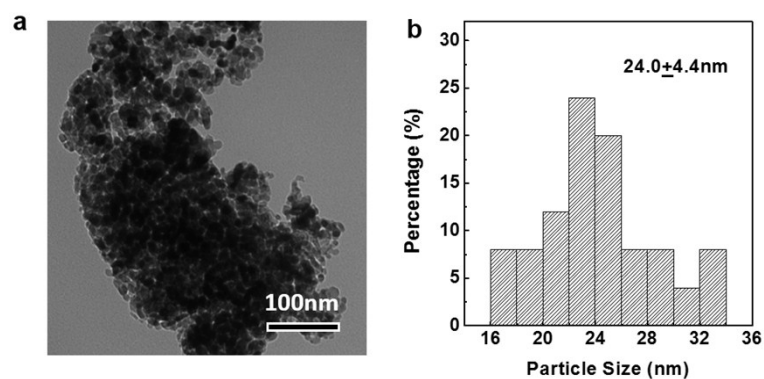

**Figure S3.** (a) TEM image and (b) size distribution of the Ni@NC nanoparticles.

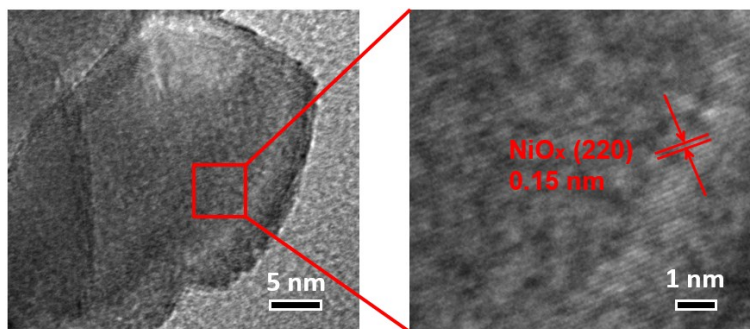

Figure S4. HRTEM images of the Ni@NC catalysts.

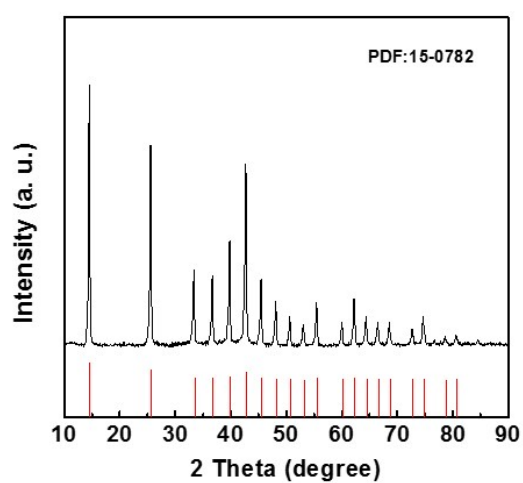

Figure S5. XRD pattern of the Ni(HCO<sub>3</sub>)<sub>2</sub> precursor.

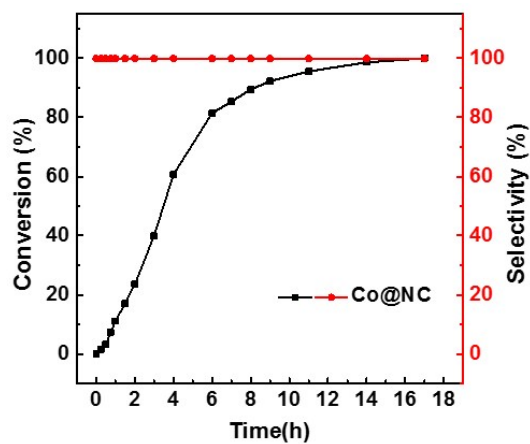

Figure S6. The time course of catalytic activity and chemoselectivity of the Co@NC catalysts for hydrogenation of 4-chlorostyrene.

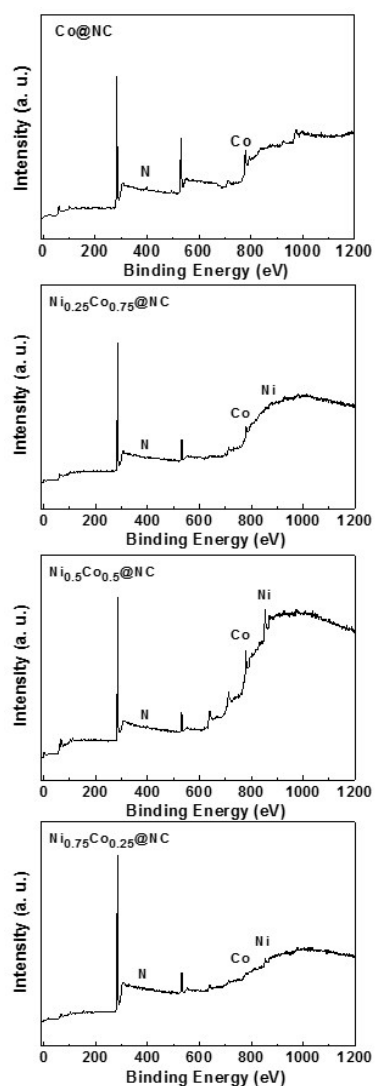

**Figure S7.** XPS spectra of various  $\text{Ni}_x\text{Co}_{1-x}@NC$  ( $x=0, 0.25, 0.5, 0.75$ ) catalysts.

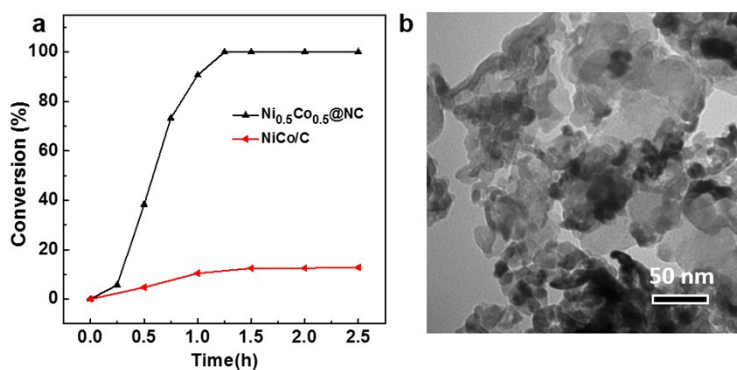

**Figure S8.** (a) The time course of catalytic activity of the  $\text{Ni}_{0.5}\text{Co}_{0.5}@NC$  and  $\text{NiCo}/C$  catalysts for hydrogenation of 4-chlorostyrene. (b) TEM image of the  $\text{NiCo}/C$  nanoparticles.

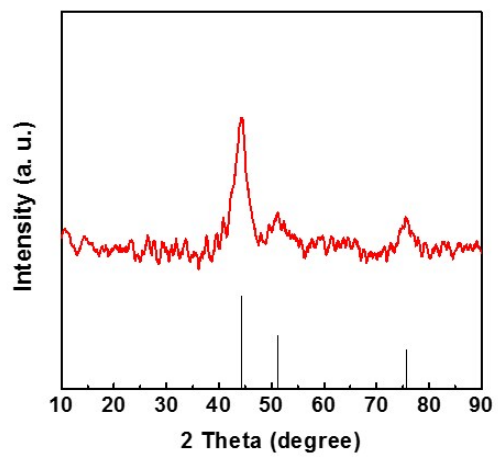

**Figure S9.** XRD pattern of the used  $\text{Ni}_{0.5}\text{Co}_{0.5}\text{@NC}$  catalysts after 8 cycles of hydrogenation reactions.

**Table S1.** Chemical compositions of the Ni<sub>x</sub>Co<sub>1-x</sub>@NC catalysts by ICP measurements.

| Sample                                    | Ni content (wt%) | Co content (wt%) | C content (wt%) |
|-------------------------------------------|------------------|------------------|-----------------|
| Ni <sub>0.25</sub> Co <sub>0.75</sub> @NC | 17.04            | 73.64            | 9.32            |
| Ni <sub>0.5</sub> Co <sub>0.5</sub> @NC   | 46.42            | 44.26            | 9.32            |
| Ni <sub>0.75</sub> Co <sub>0.25</sub> @NC | 68.68            | 22.83            | 8.49            |
| Co@NC                                     | 0                | 90.86            | 9.14            |

**Table S2.** The optimization of reaction conditions for hydrogenation of 4-chlorostyrene\*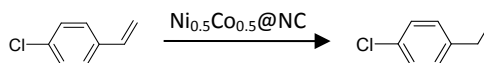

| Entry | Temperature (°C) | Pressure (MPa) | Time (h) | Conv. (%) | Sel. (%) |
|-------|------------------|----------------|----------|-----------|----------|
| 1     | 40               | 2              | 1        | 15.9      | 99.9     |
| 2     | 60               | 2              | 1        | 90.7      | 99.9     |
| 3     | 80               | 2              | 1        | 100       | 99.9     |
| 4     | 60               | 1              | 3        | 66.4      | 99.9     |
| 5     | 60               | 1.5            | 3        | 87.5      | 99.9     |
| 6     | 60               | 2              | 3        | 100       | 99.9     |

\*4-chlorostyrene (1 mmol), isopropanol (1 mL), Ni<sub>0.5</sub>Co<sub>0.5</sub>@NC catalyst (10 mg). The conversion and selectivity were determined by GC-MS and GC with m-xylene as internal standard.
